# Supplementary material for: TaNAC29, a NAC transcription factor from wheat, enhances salt and drought tolerance in transgenic Arabidopsis
Source: PubMed Central journal article supplement (PMC4632686; doi:10.1186/s12870-015-0644-9), 2015-11-04
Supplement: 12870_2015_644_MOESM2_ESM.pdf [file 12870_2015_644_MOESM2_ESM.pdf]

**Table S1. Primers used in amplification of DNA sequences**(a) Primers used for cloning full length cDNA of *TaNAC29* from wheat

| Gene Name      | Forward/reverse primers                                    |
|----------------|------------------------------------------------------------|
| <i>TaNAC29</i> | 5'- CTCCCTTCTTCTGATCGTGTG-3'<br>5'- CGCGCTTACACGACCGATT-3' |

(b) Primers used for RT-qPCR analysis of organ-specific and gene expression profiles of *TaNAC29*

| Gene Name      | Forward/reverse primers                                          |
|----------------|------------------------------------------------------------------|
| <i>TaNAC29</i> | 5'- CGAGCCCGGAAGAGTCAT-3'<br>5'- CGCGCTTACACGACCGAT-3'           |
| <i>TaActin</i> | 5'- TCTATTTTGGCCTCTCTTAGCAC -3'<br>5'- TTTCCTGTACCCCTTATTCTC -3' |

(c) Primers used for cloning of *TaNAC29*-GFP fusion protein for testing subcellular localization

| Gene Name      | Forward/reverse primers                                                   | Restriction enzyme           |
|----------------|---------------------------------------------------------------------------|------------------------------|
| <i>TaNAC29</i> | 5'- TGCTCTAGAATGGCGATGGCGCAGGG -3'<br>5'- TCCCCGGGGAAGTACTGAGGAAGCATC -3' | <i>Xba</i> I<br><i>Sma</i> I |

(d) Primers used for cloning complete and truncated *TaNAC29* for their transactivation analysis

| GAL4DBD-NAC                       | Forward/reverse primers                                                      | Restriction enzymes            |
|-----------------------------------|------------------------------------------------------------------------------|--------------------------------|
| <i>TaNAC29</i> <sub>1-357</sub>   | 5'- CCGGAATTCATGGCGATGGCGCAGG-3'<br>5'- CGCGGATCCTTAGAACTGAGGAAGCAT-3'       | <i>Eco</i> R1<br><i>Bam</i> H1 |
| <i>TaNAC29</i> <sub>1-177</sub>   | 5'- CCGGAATTCATGGCGATGGCGCAGG-3'<br>5'- CGCGGATCCCTTCTTGTAGATCCGGCAT-3'      | <i>Eco</i> R1<br><i>Bam</i> H1 |
| <i>TaNAC29</i> <sub>178-357</sub> | 5'- CCGGAATTCACCGGCCTGGCGTCGCCGAT-3'<br>5'- CGCGGATCCTTAGAACTGAGGAAGCAT-3'   | <i>Eco</i> R1<br><i>Bam</i> H1 |
| <i>TaNAC29</i> <sub>1-261</sub>   | 5'- CCGGAATTCATGGCGATGGCGCAGG-3'<br>5'-CGCGGATCCCTCGGCGTCGAGGATCTG-3'        | <i>Eco</i> R1<br><i>Bam</i> H1 |
| <i>TaNAC29</i> <sub>1-250</sub>   | 5'- CCGGAATTCATGGCGATGGCGCAGG-3'<br>5'- CGCGGATCCGTCGAAGAGCTCGGAGAAG-3'      | <i>Eco</i> R1<br><i>Bam</i> H1 |
| <i>TaNAC29</i> <sub>1-233</sub>   | 5'- CCGGAATTCATGGCGATGGCGCAGG-3'<br>5'- CGCGGATCCCGGCTGCTGCGTGATCATGGT-3'    | <i>Eco</i> R1<br><i>Bam</i> H1 |
| <i>TaNAC29</i> <sub>178-242</sub> | 5'- CCGGAATTCACCGGCCTGGCGTCGCCGAT-3'<br>5'- CGCGGATCCGATCGTGGGGAGTC-3'       | <i>Eco</i> R1<br><i>Bam</i> H1 |
| <i>TaNAC29</i> <sub>243-273</sub> | 5'- CCGGAATTCCTTCTTCCGAGCTCTTC-3'<br>5'- CGCGGATCCGTGGACGGCGAGGTGGTGGGT-3'   | <i>Eco</i> R1<br><i>Bam</i> H1 |
| <i>TaNAC29</i> <sub>274-312</sub> | 5'- CCGGAATTCCTTCCCTGAACATGCTCCTC-3'<br>5'- CGCGGATCCCTTGCCTTCCCGCGCTCCC-3'  | <i>Eco</i> R1<br><i>Bam</i> H1 |
| <i>TaNAC29</i> <sub>313-357</sub> | 5'- CCGGAATTCGCCGCGAGCCCGGAAGAGTCA-3'<br>5'- CGCGGATCCTTAGAACTGAGGAAGCAT -3' | <i>Eco</i> R1<br><i>Bam</i> H1 |

(e) Primers used for cloning *TaNAC29* into pBI121 vector, and for semi-quantitative RT-PCR analysis

|                       | Forward/reverse primers              | Restriction enzymes |
|-----------------------|--------------------------------------|---------------------|
| <i>pBI121-TaNAC29</i> | 5'- TGCTCTAGAATGGCGATGGCGCAGGG-3'    | <i>Xba</i> I        |
|                       | 5'- TCCCCCGGGTTAGAACTGAGGAAGCATC -3' | <i>Sma</i> I        |
| semi-quantitative     | 5'- TTCGCGCTGATACCAGACGTT -3'        |                     |
| RT-PCR analysis       | 5'- CCTTCCCTGAACATGCTCCT -3'         |                     |

(f) Primers used for analyzing expression of relevant genes in wild-type and *TaNAC29* transgenic lines by qRT-PCR method

| Gene name     | Forward/reverse primers                                          |
|---------------|------------------------------------------------------------------|
| <i>actin2</i> | 5'- GGTAACATTGTGCTCAGTGGTGG-3'<br>5'- AACGACCTTAATCTTCATGCTGC-3' |
| <i>RD29b</i>  | 5'- GGAGTTCAAGATTCTGGGAAC-3'<br>5'- CATCAAAGTTCACAAACAGAGGC-3'   |
| <i>SAG13</i>  | 5'- AGGGAGCATCGTGCTCATATCC-3'<br>5'- CCAGCTGATTCATGGCTCCTTTG-3'  |
| <i>SAG113</i> | 5'- ATTTTCTTATTCTCGCAAGTGAC-3'<br>5'- AAACACATTCGAACGACGCTA-3'   |
| <i>ERD11</i>  | 5'- CAACTAAGAACTCTTCGAC-3'<br>5'- ATTCAAATCAAACACTCGG-3'         |
| <i>AIB1</i>   | 5'- TTGCGGGATCATCAGTTGCT-3'<br>5'- TCCTGCTCCTGCTAACAAGC-3'       |
| <i>ABI5</i>   | 5'- AACGGGAGATTGCGGACATT-3'<br>5'- ACAGGGAACACTAGTAAAGCAGA-3'    |
